# Supplementary material for: Using Soxhlet Ethanol Extraction to Produce and Test Plant Material (Essential Oils) for Their Antimicrobial Properties
Source: PubMed Central journal article supplement — J Microbiol Biol Educ. 2014 May 1;15(1):45–6. doi: 10.1128/jmbe.v15i1.656 (PMC4004744; doi:10.1128/jmbe.v15i1.656), 2014-05-01
Supplement: JMBE-15-45-s001.pdf [file JMBE-15-45-s001.pdf]

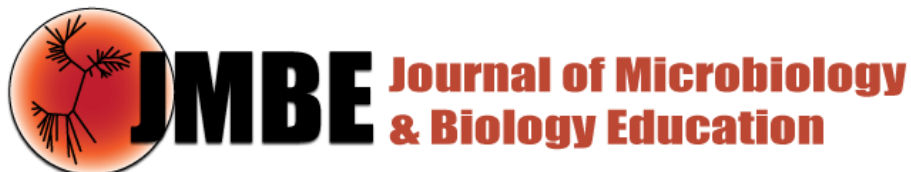

---

## Supplemental Materials

for

### Using Soxhlet Ethanol Extraction to Produce and Test Plant Material (Essential Oils) for Their Antimicrobial Properties

James Redfern<sup>1</sup>, Malcolm Kinninmonth<sup>1</sup>, Dariel Burdass<sup>2</sup>, and Joanna Verran<sup>1\*</sup>

<sup>1</sup>*School of Health Care Science, Manchester Metropolitan University, Manchester, UK,*

<sup>2</sup>*Society for General Microbiology, Reading, UK*

### Table of Contents

(Total pages 2)

Appendix 1: Potential modifications to the activity

\*Corresponding author. Mailing address: School of Healthcare Science, Manchester Metropolitan University, Chester St., Manchester M1 5GD, UK. Phone: 44-161-247-1206. Fax: 44-161-247-6840. E-mail: [j.verran@mmu.ac.uk](mailto:j.verran@mmu.ac.uk).

©2014 Author(s). Published by the American Society for Microbiology. This is an Open Access article distributed under the terms of the a Creative Commons Attribution – Noncommercial – Share Alike 3.0 Unported License (<http://creativecommons.org/licenses/by-nc-sa/3.0/>), which permits unrestricted non-commercial use and distribution, provided the original work is properly cited.

## Appendix 1: Potential modifications to the activity.

---

The activity can be modified to meet your curricula requirements. It can range from a standard extraction of one plant and testing for antimicrobial activity, to a larger investigative project that can look at a range of variables. If enough plant materials are tested against microorganisms, then this would provide substantial data for students to complete a comprehensive analysis for efficacy of antimicrobial compounds. Variables include:

- Comparisons between fresh and dried herbs. Dried thyme is easier to handle because it does not leak any liquid, is cheaper and can be stored for future use. Fresh thyme provided a greater yield.
- Comparison between crushed and non-crushed herbs.
- Comparison of antimicrobial effect between direct and vapor contact (1).
- Comparison between different plants known to have antimicrobial actions (e.g. eucalyptus, peppermint and lavender).
- Testing the student's own extract against an essential oil purchased from a supplier (for example an oil tincture used for aromatherapy). Dilutions of the commercially available oil (in a carrier oil such as grapeseed oil) can be tested against Soxhlet extract as an assay.
- Gas chromatography can also be used to identify what molecules are present in the extract (2).

## REFERENCES

1. **Cavanagh, H. M. A., and J. M. Wilkinson.** 2002. Biological activities of lavender essential oil. *Phytotherapy Res.* **16(4)**:301–308.
2. **Hawthorne, S. B., M. S. Krieger, and D. J. Miller.** 1988. Analysis of flavor and fragrance compounds using supercritical fluid extraction coupled with gas chromatography. *Analytical Chem.* **60(5)**:472–477.
